# Supplementary material
Source: PubMed Central journal article supplement (PMC7655346)
Supplement: 18-00584.pdf [file 18-00584.pdf]

## ON-LINE APPENDIX

1) WEB treatment of a small ruptured anterior communicating artery aneurysm (AcomA): <https://youtu.be/esFVfq74KBI>.

2) WEB treatment of an irregular ruptured posterior communicating artery (PcomA) aneurysm with corking of the neck: [https://youtu.be/lAYyBR1s\\_50](https://youtu.be/lAYyBR1s_50).

3) WEB treatment of a small ruptured carotid tip aneurysm: <https://youtu.be/Yp2vVDdpo1I>.

4) WEB treatment of an incidental wide-neck anterior communicating artery aneurysm (AcomA): <https://youtu.be/bviBf5VrI-U>.

5) Parent vessel occlusion with 2 WEBs for a ruptured V4 dissection aneurysm: <https://youtu.be/Hdd8R9WZnbM>.
